# Supplementary material for: Light-driven Lattice Soft Microrobot with Multimodal Locomotion
Source: Research Square preprint supplement (doi:10.21203/rs.3.rs-5655036/v1), 2024-12-24
Supplement: Supplementary file 1 [file 96cb9f9c9e1367a4b662d2b7.docx]

Supplementary Information for

# Light-driven Lattice Soft Microrobot with Multimodal Locomotion

Mingduo Zhang1†, Yuncheng Liu1†, Chunsan Deng1, Xuhao Fan1, Zexu Zhang1, Shaoxi Shi1, Fayu Chen1,Huace Hu1, Leimin Deng1,2, Lige Liu3, Tao Sun3, Hui Gao1,2, Wei Xiong1,2*

1Wuhan National Laboratory for Optoelectronics, School of Optical and Electronic Information, Huazhong University of Science and Technology; Wuhan, China.

2Optics Valley Laboratory; Wuhan, Hubei, China.

3State Key Laboratory of High End Heavy Load Robots, Midea Group, Foshan, China.

*Corresponding author. Email: [weixiong@hust.edu.cn](mailto:weixiong@hust.edu.cn)

# The file includes:

Supplementary Note 1 to Note 2

Supplementary Fig. S1 to Fig. S9

Supplementary Table 1

# **Other Supplementary Information for this manuscript includes the following:**

Movies S1 to S10

# Supplementary Note

Note S1. Discussion of the relationship between movement speed and laser scanning speed

The movement displacement can be obtained,

where *D* is the motion displacement of the LSMR, *Lstep* is the single peristalsis step displacement, and *Nscanning* is the number of laser scans. The single peristalsis step displacement depends on the displacement of the contraction process minus the displacement of the recovery process shown in Fig. 3 of the main text and is calculated as,

where *Lb* is the length of the deformation region at the end of the robot. *fs* and *fd* describe the shrinking radio of time in the shrinking and swelling processes, respectively. *t* is the time for the laser to pass through the deformation region. The number of laser scans depends on the laser scanning speed, scanning time, and the length of the single scan, which can be calculated as,

where *vs* is the laser scanning speed, *ts* is the laser scanning time, and *Ls* is the laser scanning distance within a single cycle.

Inserting subsequently Equation(S2) and Equation(S3) into Equation(S1) a expression for *D* can be obtained:

Meanwhile, the movement distance of LSMR can be expressed as,

where *vl* is the movement speed of the LSMR. The time of laser to pass through the deformation region can be calculated as,

Inserting subsequently Equation(S5) and Equation(S6) into Equation(S4) a expression for *vl* can be obtained:

The variation of shrinking radio with time during shrinking and swelling can be obtained by fitting the data shown in Fig. 2e in Results. The shrinking process shrinking radio can be expressed as,

where *A1*=0.00975, *A2* = 0.2027, *x0* = 0.33745, *dx* = 0.1106. The swelling process shrinking radio can be expressed as,

where *y0*=-0.0136, *A*=0.21649, *frac*=0.56217, *x01*=0.74557, *x02*=2.19965, *k1*=-0.36545, *k2*=-0.09528.

Inserting subsequently Equation(S6), Equation(S8) and Equation(S9) into Equation(S7) a expression for *vl* can be obtained:

Note S2. Comparison of energy utilization efficiency between lattice structure and solid structure

The lattice and solid structures undergo the same photo-thermal conversion process and are tested in the same environment. Therefore, we consider that both experience the same proportion of energy conversion loss, which is ignored in the following calculations. We consider only the direct conversion of laser energy to LSMR kinetic energy:

where *η* is energy conversion efficiency, *W* is the cumulative energy of the laser over a certain period of time, and *E* is the kinetic energy of the microbots:

where *P* is the laser power, *t* is time, *m* is the mass of the microrobot, and *v* is the speed of the microrobot.

Since the lattice and solid structures use the same material and process parameters, we assume that the material density(*ρ*) is the same for both.

where *R* is relative density, and *V* is the space volume of the robot's smallest external square.

Inserting subsequently Equation(S14), Equation(S13), and Equation(S12) into Equation(S11) a expression for *η* can be obtained:

where the corner label *l* represents the lattice structure and the corner label *s* represents the solid structure. *Rl* = 0.32, *Rs* = 1, *vl* = 7.45 μm/s, *vs* = 2.59 μm/s, *Pl* = 50 mW, *Ps* = 300 mW. Eventually, we get:

# Supplementary Figure


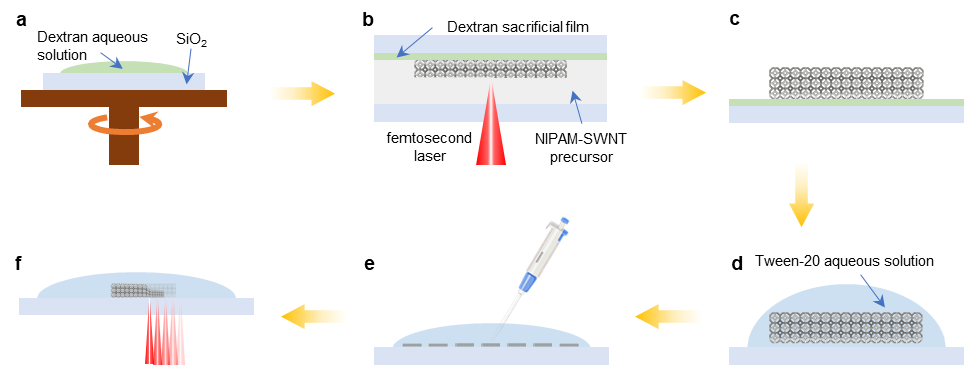


**Fig. S1.** **Schematic illustration of the manufacturing process of the lattice soft microrobots.** **a** Spin-coating sacrificial layer. **b** The process of dirct laser writing. **c** Dissolve unpolymerized precursors. **d** Dissolve the sacrificial layer to release the LSMR from the substrate. **e** Transform the LSMR to application scenarios by a pipette. **f** Light driven the LSMR movement.


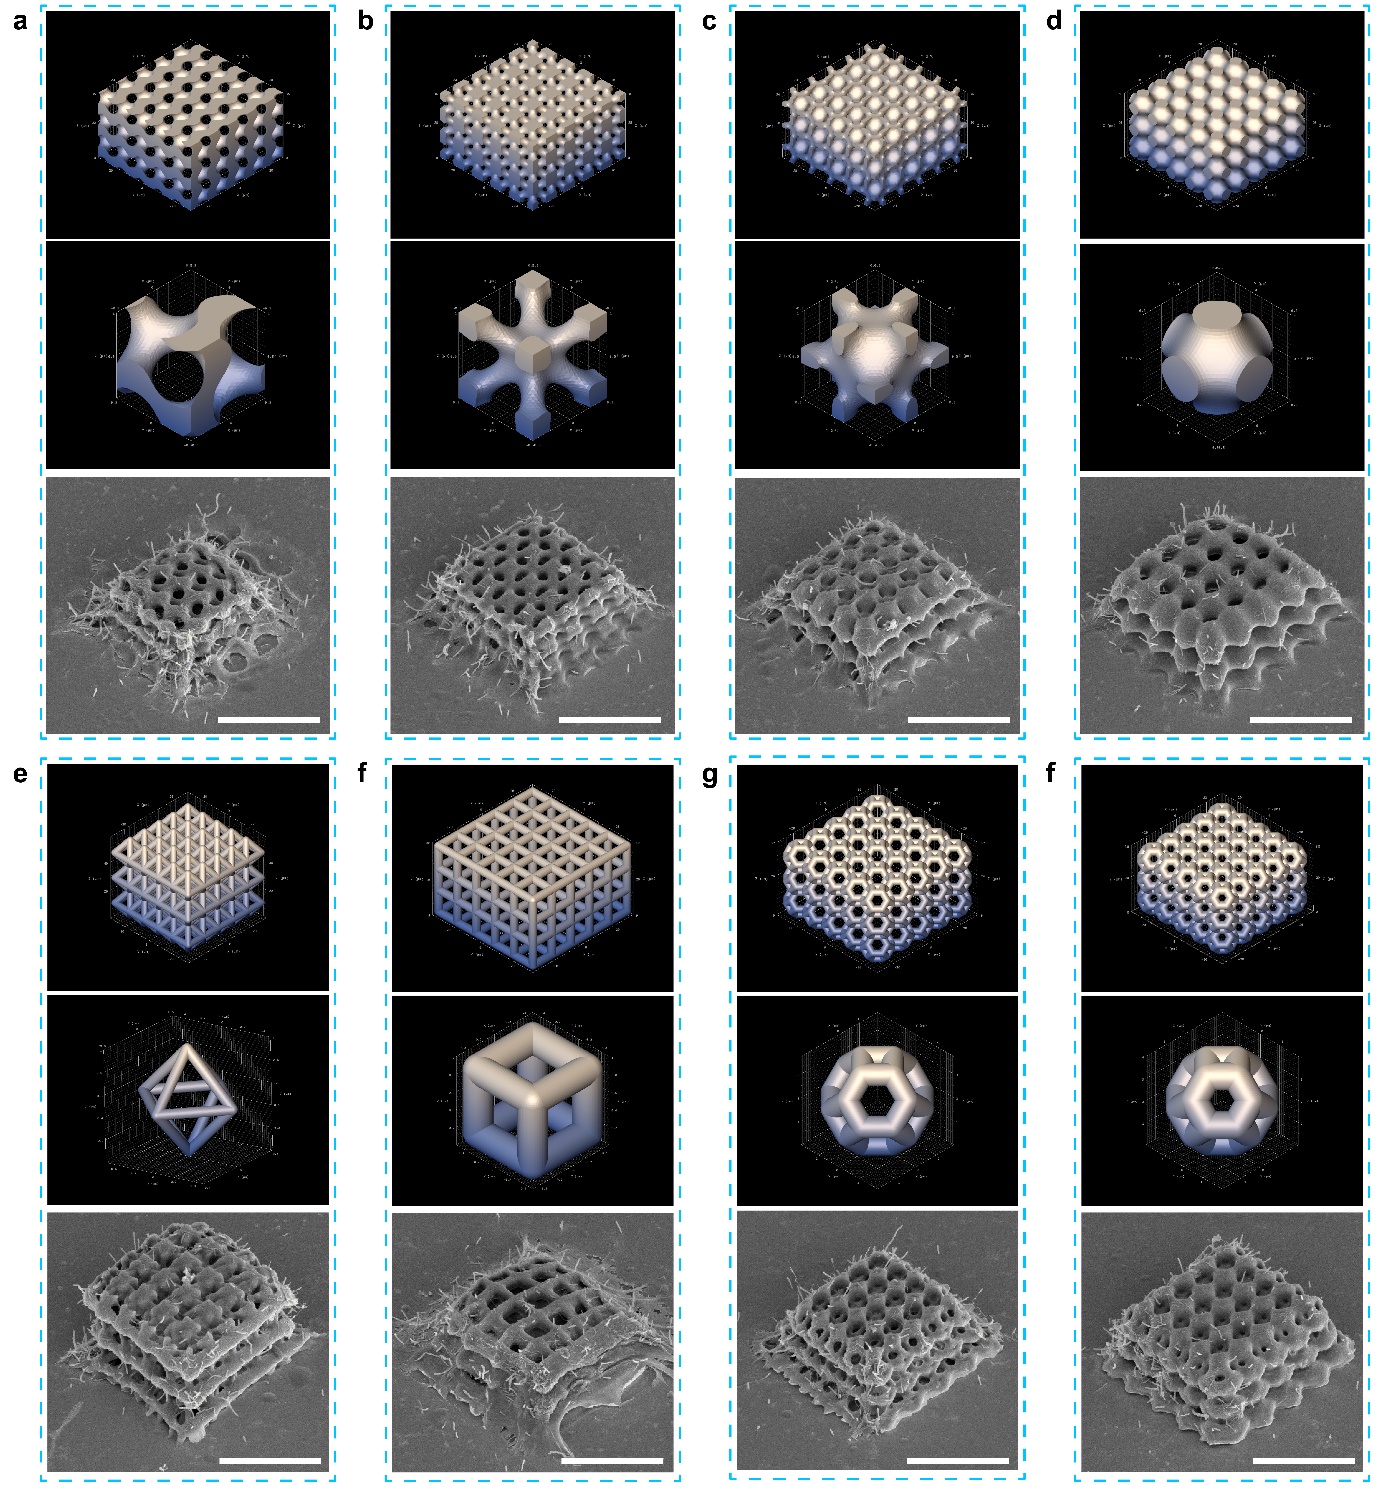


**Fig. S2. Different types of lattice architecture.** Triple-period minimum surface type lattice, including: **a** gyroid, **b** I-WP, **c** neovius, **d** primitive. Truss type lattice, including: **e** octahedral lattice, **f** square lattice, **g** truncated octahedra, **h** truncated octahedra. All scales bar: 30 μm.


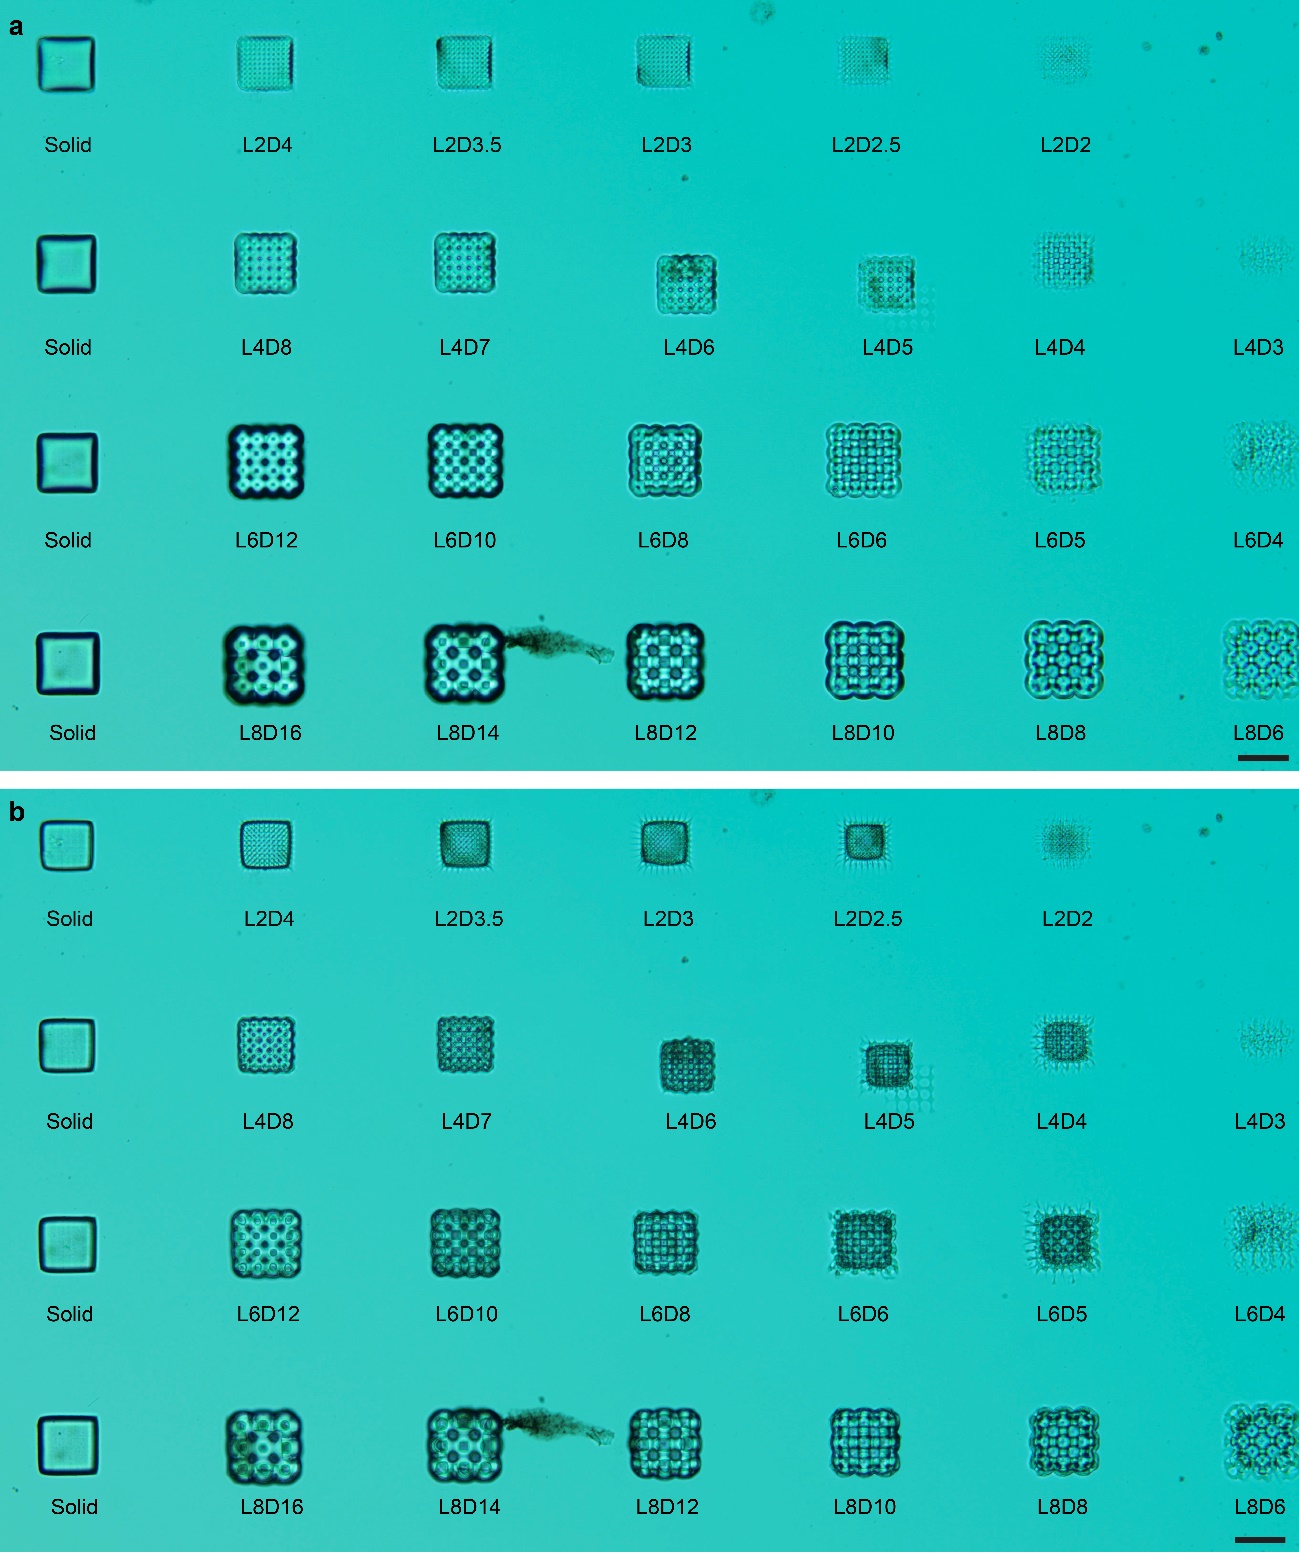


**Fig. S3 Optical microscopy images of lattice structure in the swollen and shrunken states. a** Optical microscopy images of solid structures and lattice structures of multiple parameters in the swelling state. Scale bar: 50 μm. **b** Optical microscopy images of solid structures and lattice structures of multiple parameters in the shrinking state. Scale bar: 50 μm.


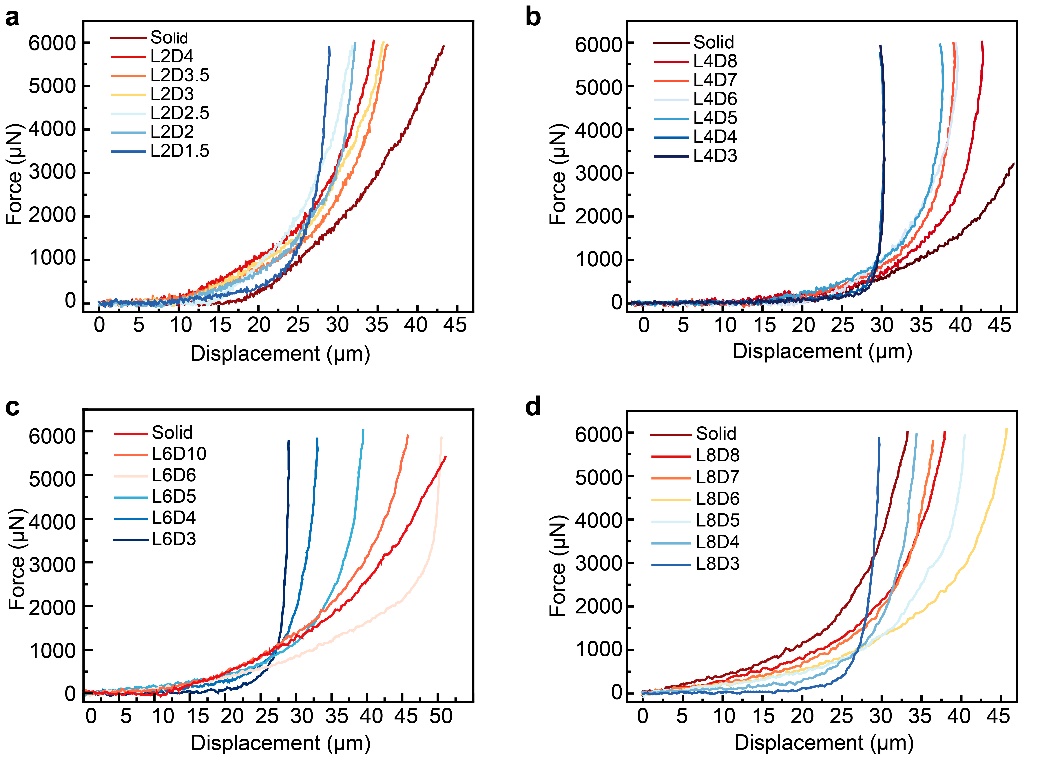


**Fig. S4. Mechanical properties testing of lattice structures. a** Force-displacement curves for lattice and solid structures with the rod length of 2 μm. **b** Force-displacement curves for lattice and solid structures with the rod length of 4 μm. **c** Force-displacement curves for lattice and solid structures with the rod length of 6 μm. **d** Force-displacement curves for lattice and solid structures with the rod length of 8 μm.


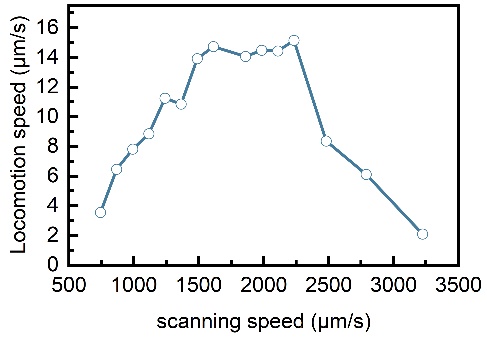


**Fig. S5 Change of microrobot speed as a function of laser scan speeds.**

**
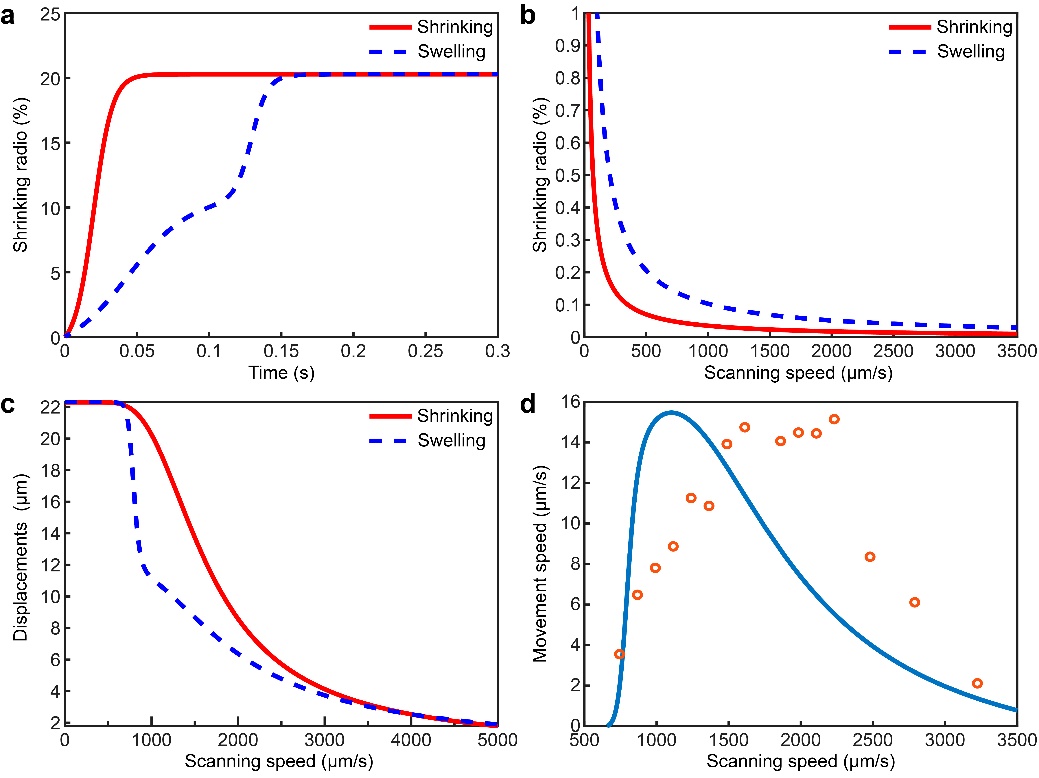
**

**Fig. S6 Correlation of LSMR movement speed and laser scanning speed. a** Shrinking rodio of lattice structure at shrinking process and swelling process. **b** LSMR shrinking rodio at different laser scanning speeds. The LSMR body length is 110 μm, the laser heat-affected zone diameter is 28 μm, and the laser single scan distance is 600 μm. **c** End displacement of LSMR at different scanning speeds. **d** LSMR movement speed at different scanning speeds.


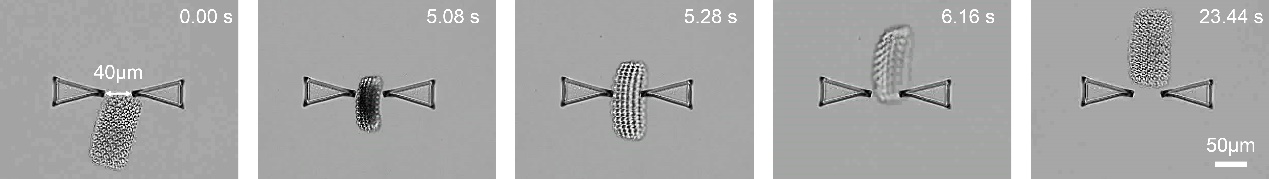


**Fig. S7.** The LSMR with a body width of 60 μm crossed a 40 μm slit, flipped sideways, and floated during travel.


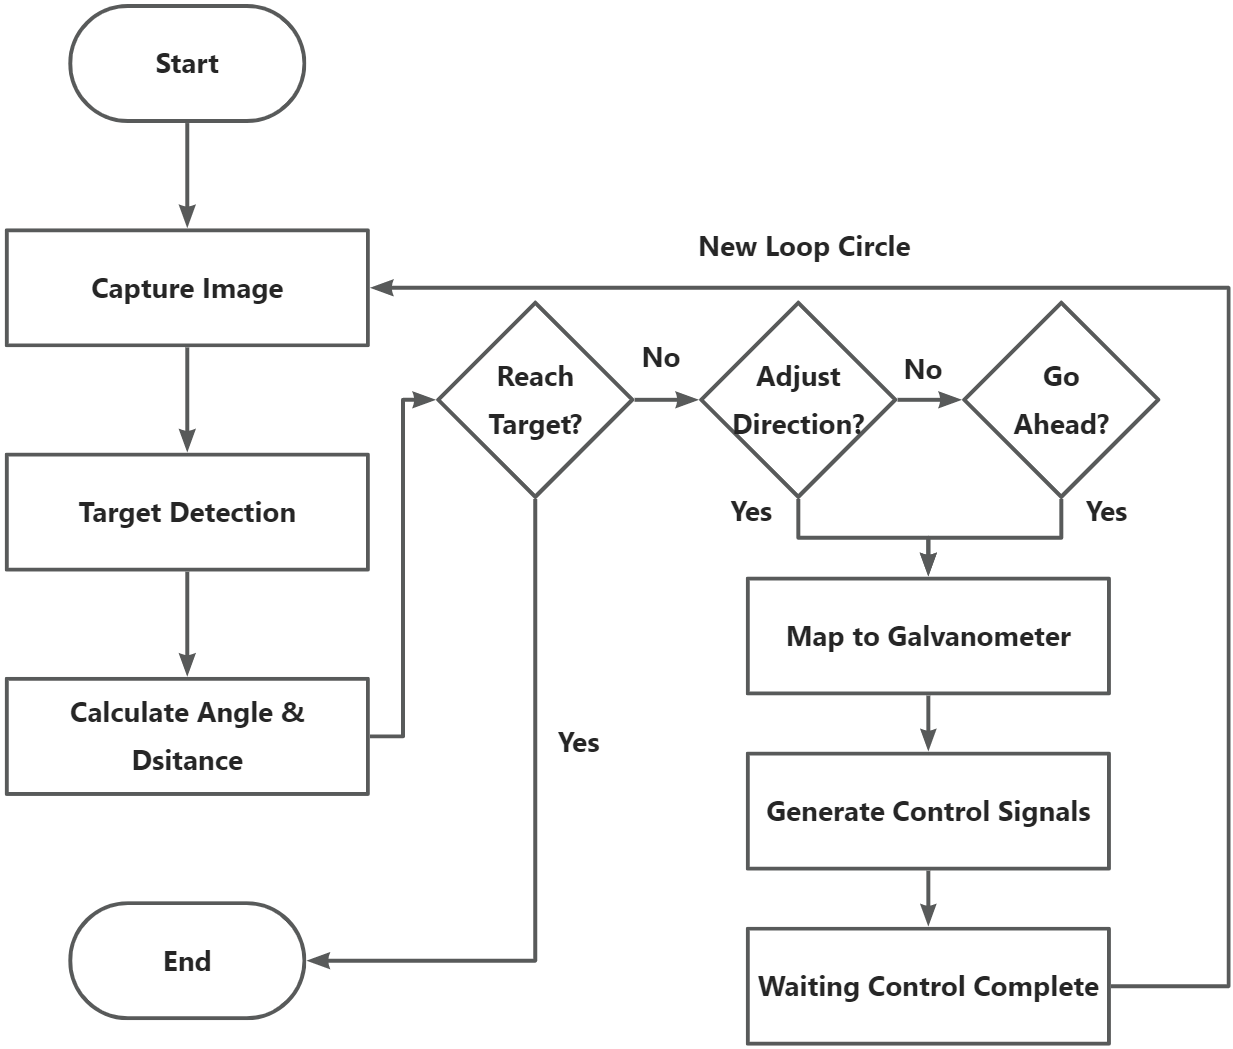


**Fig. S8. The program flowchart of the closed-loop control system**


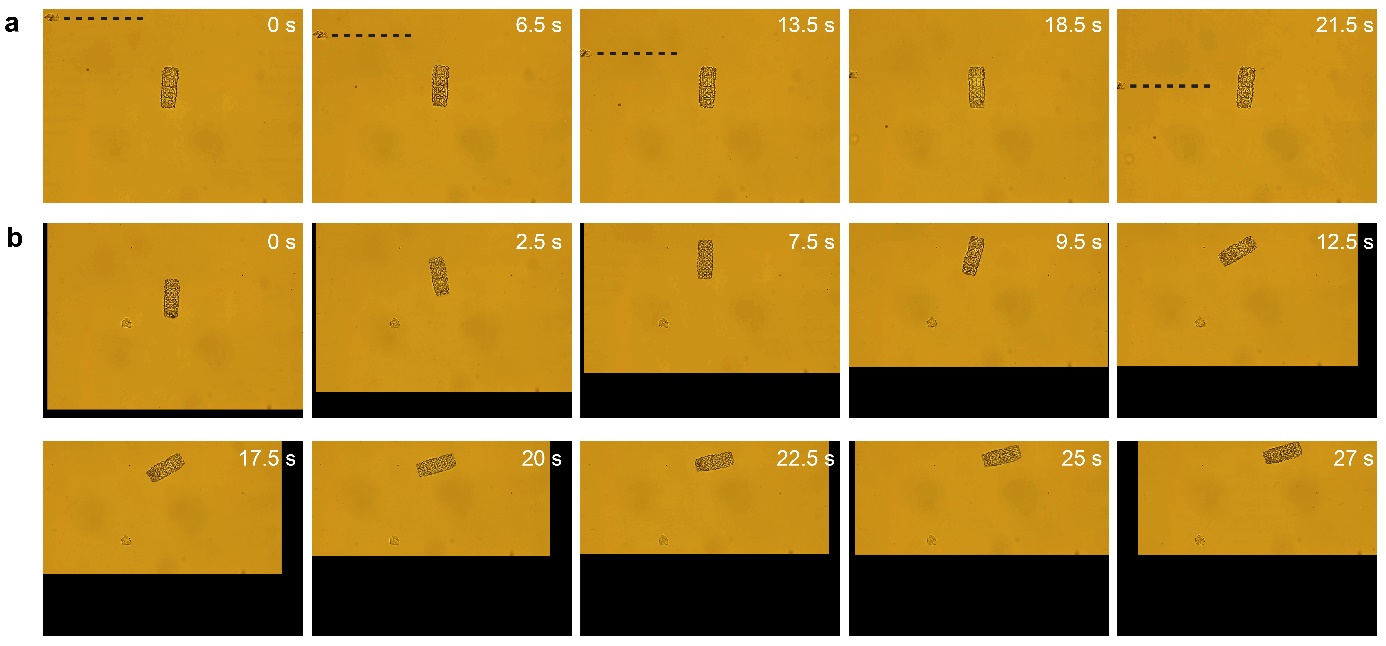


**Fig. S9. Continuous skipping based on the thermophoretic effect. a** Decomposed images of the linear continuous jump superimposed image. **b** Decomposed images of the superimposed image.

# Supplementary Table

**Table S1. Design parameters of lattice structures shown in Fig. S3**

| Design parameters (L*x*D*y*) | Block length design value (μm) | Block height design value (μm) | Corresponding solid structure volume(mm³) | Lattice structure volume(mm³) | Relative density |
| --- | --- | --- | --- | --- | --- |
| L2D1 | 57.569 | 34.941 | 1.158×10-4 | 1.94×10-5 | 16.75% |
| L2D1.5 | 58.069 | 35.441 | 1.195×10-4 | 3.87×10-5 | 32.38% |
| L2D2 | 58.569 | 35.941 | 1.233×10-4 | 5.97×10-5 | 48.42% |
| L2D2.5 | 59.045 | 36.433 | 1.270×10-4 | 8.00×10-5 | 62.98% |
| L2D3 | 59.569 | 36.941 | 1.311×10-4 | 9.93×10-5 | 75.76% |
| L2D3.5 | 60.12 | 37.5 | 1.355×10-4 | 1.13×10-4 | 83.25% |
| L2D4 | 60.02 | 38 | 1.369×10-4 | 1.23×10-4 | 89.85% |
| Cube | 60 | 60 | 2.160×10-4 |  | 100.00% |
| L4D2 | 58.67 | 36.02 | 1.240×10-4 | 2.10×10-5 | 16.97% |
| L4D3 | 59.56 | 36.94 | 1.310×10-4 | 4.20×10-5 | 32.02% |
| L4D4 | 60.6 | 37.98 | 1.395×10-4 | 6.54×10-5 | 46.90% |
| L4D5 | 61.6 | 38.96 | 1.478×10-4 | 8.86×10-5 | 59.96% |
| L4D6 | 62.58 | 39.96 | 1.565×10-4 | 1.11×10-4 | 70.74% |
| L4D7 | 63.58 | 40.96 | 1.656×10-4 | 1.29×10-4 | 77.92% |
| L4D8 | 64.58 | 41.96 | 1.750×10-4 | 1.44×10-4 | 82.27% |
| Cube | 60 | 60 | 2.160×10-4 | - | 100.00% |
| L6D3 | 70.97 | 53.99 | 2.719×10-4 | 4.60×10-5 | 16.92% |
| L6D4 | 71.86 | 54.89 | 2.834×10-4 | 7.44×10-5 | 26.25% |
| L6D5 | 72.93 | 55.97 | 2.977×10-4 | 1.10×10-4 | 36.83% |
| L6D6 | 73.92 | 56.96 | 3.112×10-4 | 1.44×10-4 | 46.41% |
| L6D8 | 75.91 | 58.94 | 3.396×10-4 | 2.13×10-4 | 62.72% |
| L6D10 | 77.9 | 60.94 | 3.698×10-4 | 2.75×10-4 | 74.46% |
| L6D12 | 79.9 | 62.93 | 4.017×10-4 | 3.24×10-4 | 80.53% |
| Cube | 60 | 60 | 2.160×10-4 | - | 100.00% |
| L8D4 | 71.865 | 49.233 | 2.543×10-4 | 4.23×10-5 | 16.64% |
| L8D6 | 73.944 | 51.292 | 2.805×10-4 | 8.74×10-5 | 31.16% |
| L8D8 | 75.9 | 53.27 | 3.069×10-4 | 1.37×10-4 | 44.64% |
| L8D10 | 77.902 | 55.284 | 3.355×10-4 | 1.90×10-4 | 56.48% |
| L8D12 | 79.882 | 57.255 | 3.654×10-4 | 2.40×10-4 | 65.61% |
| L8D14 | 81.9 | 59.277 | 3.976×10-4 | 2.85×10-4 | 71.68% |
| L8D16 | 83.882 | 61.255 | 4.310×10-4 | 3.25×10-4 | 75.41% |
| Cube | 60 | 60 | 2.160×10-4 | - | 100.00% |

# Legends for movies

Movie S1 Light response deformation of lattice structure with different relative densities

Movie S2 Ordered peristalsis deformation of microrobots under sequential laser scanning

Movie S3 Comparison of energy conversion rates between lattice and solid structures

Movie S4 Continuous linear peristalsis and in-situ rotation of microrobot

Movie S5 Microbot squeeze through narrow slit

Movie S6 Manual control of the micro-robot's “H” path movement

Movie S7 Programmed motion manipulated by the closed-loop feedback control system

Movie S8 Thermophoresis-based straight-line and right-turn continuous hopping

Movie S9 Continuous hopping to maneuver the maze based on thermophoretic
